# Supplementary material
Source: PubMed Central journal article supplement (PMC4790712)
Supplement: selc006181.wt1_default.pdf [file selc006181.wt1_default.pdf]

## Appendix A: Diagnoses (ICD-8 and ICD-10) and medication (ATC) codes used in the study.

|                                      | Code                                                                                                                                             |
|--------------------------------------|--------------------------------------------------------------------------------------------------------------------------------------------------|
| Thyroid disease (ICD and ATC codes)  |                                                                                                                                                  |
| Hypothyroidism                       | ICD-10: E02-03, E063                                                                                                                             |
| Hyperthyroidism                      | ICD-10: E05, E062                                                                                                                                |
| Post-partum Thyroiditis              | ICD-10: O095                                                                                                                                     |
| Any thyroid related diagnose         | ICD-8: 240-246<br>ICD-10: E00-E06                                                                                                                |
| Levothyroxine                        | ATC: H03AA01                                                                                                                                     |
| Methimazole                          | ATC: H03BB02, H03BB01                                                                                                                            |
| Propyltiouracil                      | ATC: H03BA02                                                                                                                                     |
| Cardiovascular (ICD and ATC codes)   |                                                                                                                                                  |
| Atrial fibrillation                  | ICD-8: 427.93, 427.94<br>ICD-10: I48                                                                                                             |
| Amiodarone                           | ATC: C01BD01                                                                                                                                     |
| Vitamin K antagonists                | ATC: B01AA                                                                                                                                       |
| Digoxin                              | ATC: C01AA                                                                                                                                       |
| Other covariates (ICD codes and ATC) |                                                                                                                                                  |
| Peripheral vascular disease          | ICD-10: I70-73, I771, R02                                                                                                                        |
| Cerebral vascular disease            | ICD-8: 430<br>ICD-10: I60-69                                                                                                                     |
| Ischemic heart disease               | ICD-8: 411-414<br>ICD-10: I20, I23-25                                                                                                            |
| Malignancy                           | ICD-8: 209<br>ICD-10: C00-97                                                                                                                     |
| COPD                                 | ICD-8: 490-492<br>ICD-10: J42, J44                                                                                                               |
| Diabetes                             | ICD-8: 250<br>ICD-10: E10-14                                                                                                                     |
| Rheumatic disease                    | ICD-8: 725, 7100-7101, 7104, 7140-7142, 7148<br>ICD-10: M05-06, M32-34, M35.3                                                                    |
| Chronic renal failure                | ICD-8: 585<br>ICD-10: N18, I12-13, T85.8-9, Z99.2                                                                                                |
| Gastric ulcer                        | ICD-8: 531-534<br>ICD-10: K25-27, K29, K221                                                                                                      |
| Congestive heart failure             | ICD-10: I110, I517, I42-43, I50                                                                                                                  |
| Hypertension                         | ATC: C02A, C02B, C02C, C02DA, C02L, C02DB, C02DD, C02DG, C03A, C03B, C03D, C03E, C03X, C04, C05, C07, C08, C09<br>ICD-8: 410<br>ICD-10: I21, I22 |
| Myocardial Infarction                | ICD-8: 410<br>ICD-10: I21, I22                                                                                                                   |
| Valvular heart disease               | ICD-8: 394-396, 4240, 4241<br>ICD-10: I05, I06, I34-I36, Z952                                                                                    |
