# Supplementary material
Source: PubMed Central journal article supplement (PMC4790712)
Supplement: selc006181.wt2_default.pdf [file selc006181.wt2_default.pdf]

## Appendix B: Supplementary sensitivity analysis.

|                                                                                               | Overt<br>Hypothyroidism | Subclinical<br>Hypothyroidism | Euthyroidism | Subclinical<br>Hyperthyroidism | Overt<br>Hyperthyroidism |
|-----------------------------------------------------------------------------------------------|-------------------------|-------------------------------|--------------|--------------------------------|--------------------------|
| <b>Main model</b>                                                                             | 0.67 (0.50-0.92)        | 0.88 (0.79-0.97)              | 1 (ref.)     | 1.30 (1.18-1.43)               | 1.41 (1.22-1.63)         |
| <b>Main model including time-<br/>dependent variables</b>                                     |                         |                               |              |                                |                          |
| Any treatment                                                                                 | 0.56 (0.42-0.79)        | 0.82 (0.74-0.92)              | 1 (ref.)     | 1.24 (1.13-1.37)               | 1.26 (1.08-1.47)         |
| Methimazole                                                                                   | -                       | -                             |              | 1.27 (1.15-1.40)               | 1.30 (1.09-1.54)         |
| Levothyroxine                                                                                 | 0.68 (0.49-0.94)        | 0.88 (0.79-0.98)              | 1 (ref.)     | -                              | -                        |
| <b>Stratified on follow-up</b>                                                                |                         |                               |              |                                |                          |
| 3 months                                                                                      | 0.36 (0.05-2.56)        | 0.74 (0.45-1.22)              | 1 (ref.)     | 1.03 (0.64-1.65)               | 2.66 (1.65-4.31)         |
| 6 months                                                                                      | 0.41 (0.06-2.93)        | 0.90 (0.56-1.46)              | 1 (ref.)     | 0.79 (0.45-1.38)               | 2.72 (1.63-4.54)         |
| 12 months                                                                                     | 0.69 (0.22-2.15)        | 1.03 (0.74-1.45)              | 1 (ref.)     | 1.65 (1.22-2.23)               | 1.33 (0.77-2.29)         |
| <b>Adjusted for known risk<br/>factors for AF</b>                                             |                         |                               |              |                                |                          |
| Hypertension, heart failure,<br>myocardial infarction, valvular<br>heart disease and diabetes | 0.68 (0.50-0.92)        | 0.89 (0.80-0.98)              | 1 (ref.)     | 1.31 (1.20-1.45)               | 1.42 (1.23-1.64)         |
| <b>Main model including time-<br/>dependent changes in thyroid<br/>function status</b>        | 0.81 (0.67-0.98)        | 1.04 (0.94-1.15)              | 1 (ref.)     | 1.38 (1.27-1.51)               | 2.16 (1.84-2.54)         |
| <b>Main model including<br/>adjustment for 5-year<br/>Charlson Comorbidity Index</b>          | 0.68 (0.50-0.92)        | 0.88 (0.80-0.97)              | 1 (ref.)     | 1.30 (1.18-1.43)               | 1.39 (1.20-1.62)         |
